# Supplementary material for: Venetoclax, alone and in combination with the BH3 mimetic S63845, depletes HIV-1 latently infected cells and delays rebound in humanized mice
Source: PubMed Central journal article supplement — Cell Rep Med. 2023 Aug 30;4(9):101178. doi: 10.1016/j.xcrm.2023.101178 (PMC10518630; doi:10.1016/j.xcrm.2023.101178), 2023-08-30
Supplement: mmc1.pdf [file mmc1.pdf]

**Cell Reports Medicine, Volume 4**

**Supplemental information**

**Venetoclax, alone and in combination with the BH3  
mimetic S63845, depletes HIV-1 latently infected  
cells and delays rebound in humanized mice**

**Philip Arandjelovic, Youry Kim, James P. Cooney, Simon P. Preston, Marcel Doerflinger, James H. McMahon, Sarah E. Garner, Jennifer M. Zerbato, Michael Roche, Carolin Tumpach, Jesslyn Ong, Dylan Sheerin, Gordon K. Smyth, Jenny L. Anderson, Cody C. Allison, Sharon R. Lewin, and Marc Pellegrini**

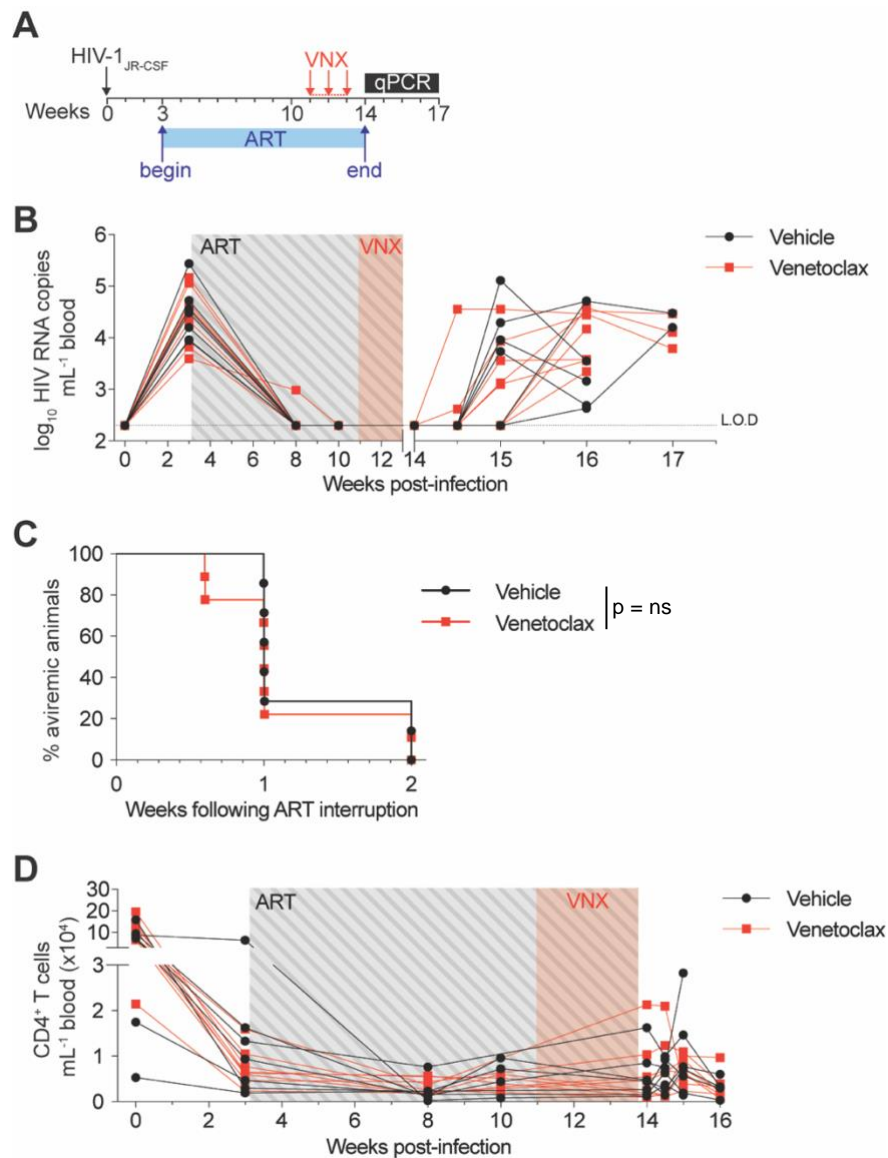

**Supplementary Fig. S1. A delay in viral rebound was not detected after three weeks of venetoclax treatment.** (A) Schematic timeline depicting HIV-1 infection, suppressive ART period and the beginning of each venetoclax treatment cycle (red arrows; administered every weekday). (B) Plasma viral loads of individual hu-mice over the course of the experiment ( $n = 7-8$  mice per group). Limit of detection (L.O.D) is indicated with a dotted horizontal line ( $2.3 \log_{10}$  RNA copies  $\text{mL}^{-1}$ ). (C) Kaplan-Maier curve representing the time to viral rebound following ART interruption. (D) Peripheral CD4<sup>+</sup> T cell counts over the course of the experiment.  $p$  value for Kaplan-Maier curve (C) was calculated using a log-rank Mantel-Cox test.  $p$  value for each timepoint in (D) was analysed using an unpaired  $t$  test corrected for multiple comparisons with Holm-Šidák method. Related to Figures 1, 2 and 3.

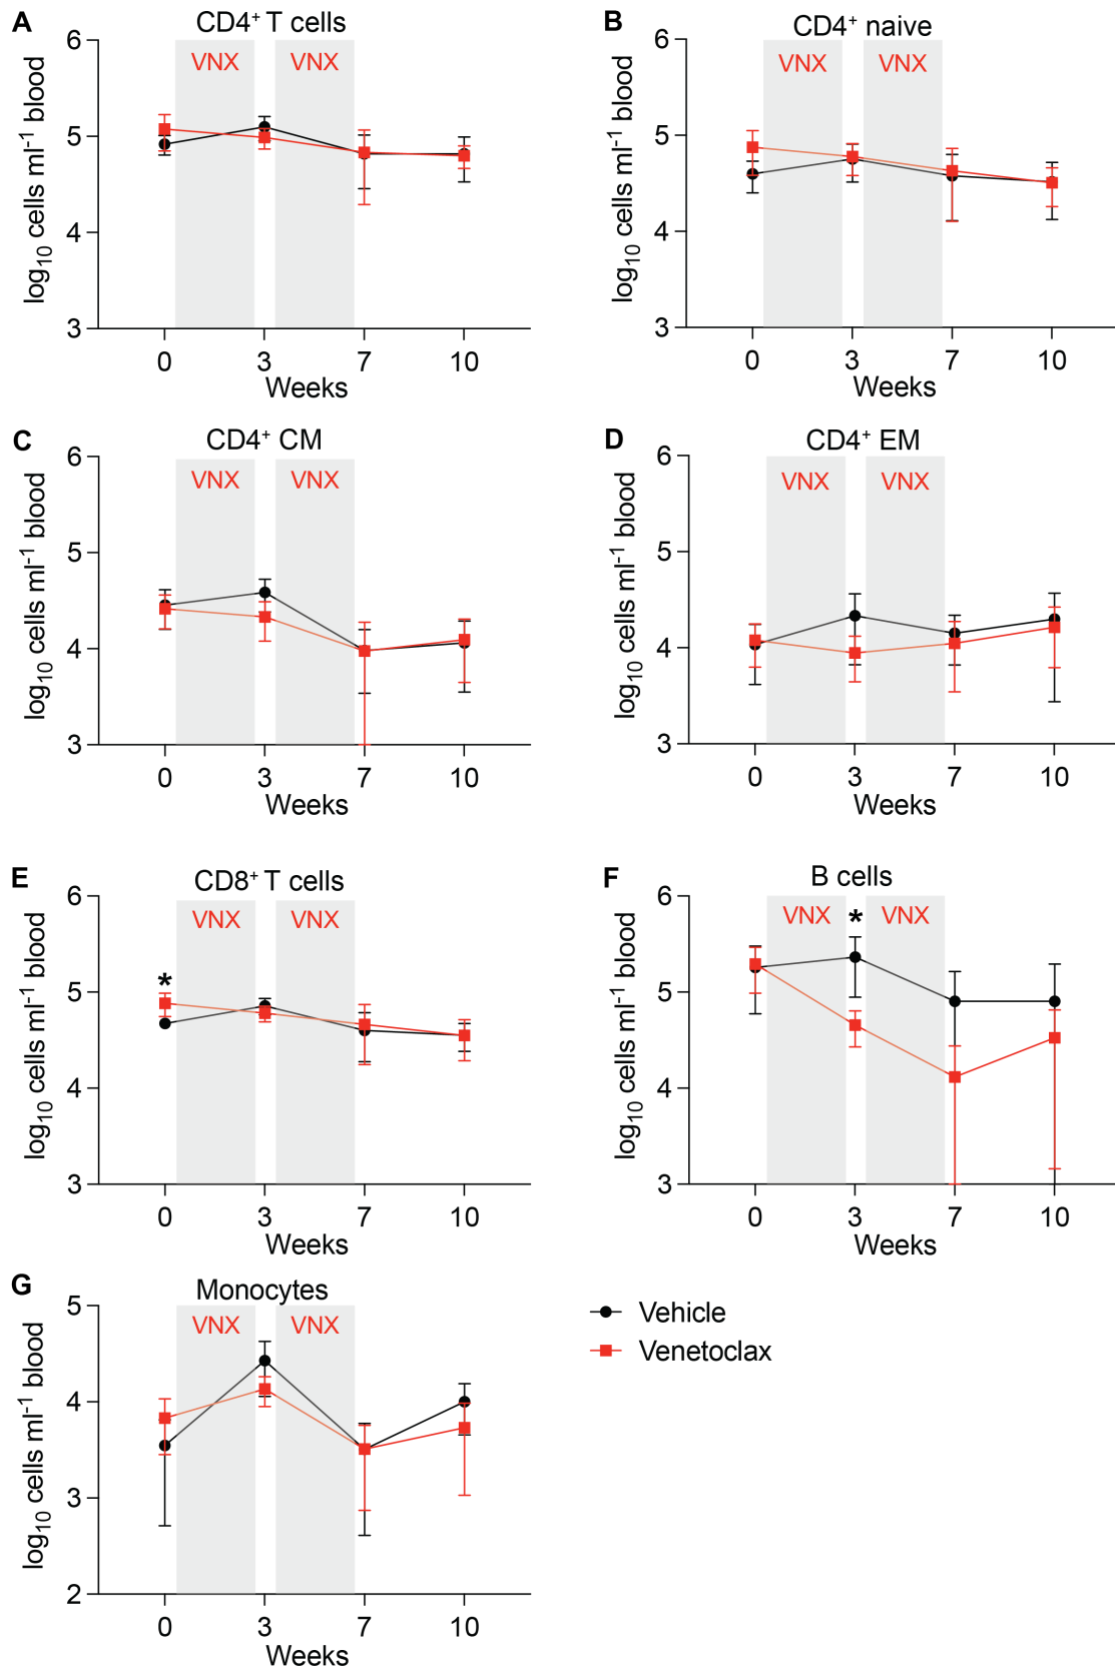

**Supplementary Fig. S2. Quantification of white blood cell subsets in uninfected hu-mice after six weeks of venetoclax treatment.** Uninfected hu-mice were treated with 100 mg/kg venetoclax for 6 weeks by oral gavage, with a 1-week drug holiday. At the end of the final treatment week, mice were bled weekly and WBC subsets enumerated by flow cytometry. **(A)** Total CD4<sup>+</sup> T cells; **(B)** Naïve CD4<sup>+</sup> T cells; **(C)** Central memory CD4<sup>+</sup> T cells; **(D)** Effector memory CD4<sup>+</sup> T cells; **(E)** Total CD8<sup>+</sup> T cells; **(F)** Total CD19<sup>+</sup> B cells; and **(G)** Total monocytes. \* $p \leq 0.05$ .  $p$  value for each timepoint in (A)-(G) was analysed using an unpaired  $t$  test corrected for multiple comparisons with Holm-Šidák method. Error bars show mean  $\pm$  S.D. Related to Figure 1.

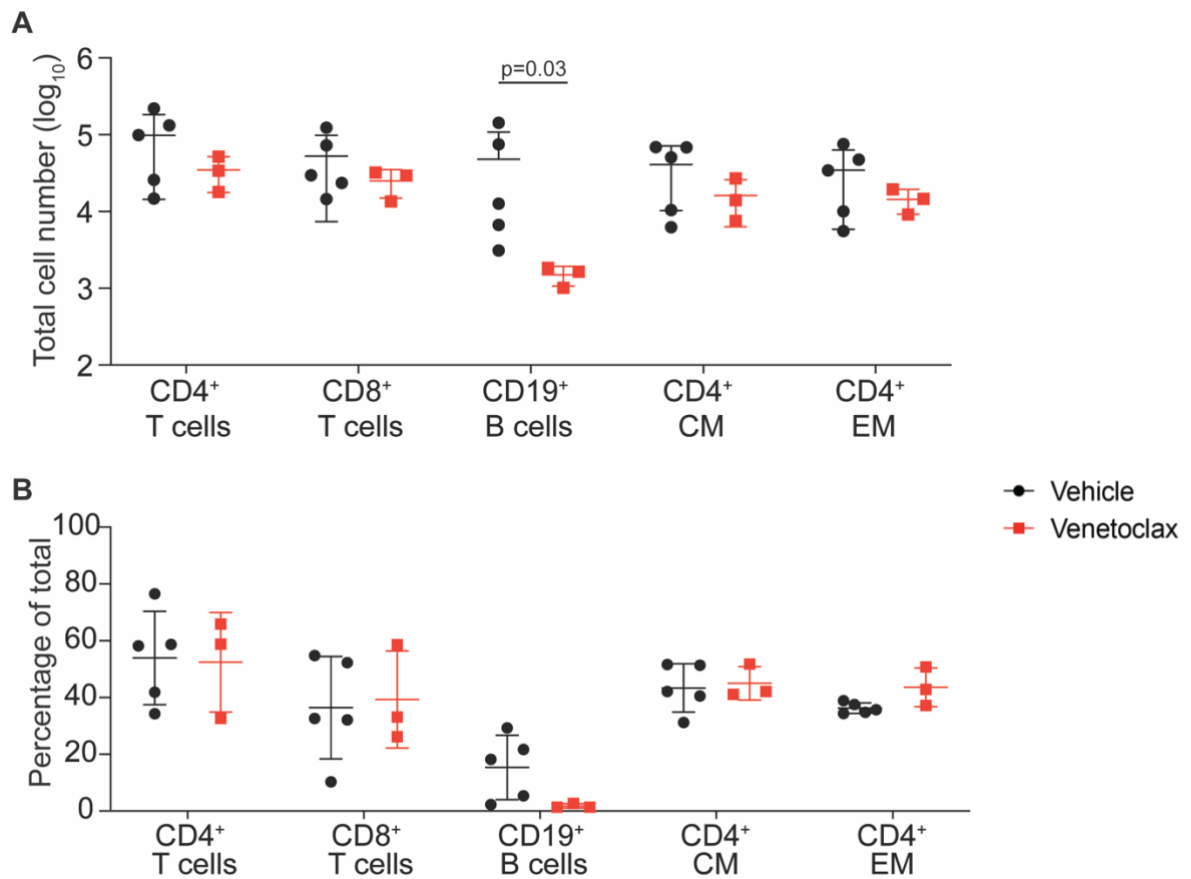

**Supplementary Fig. S3 | Differences in CD4<sup>+</sup> and CD8<sup>+</sup> T cells were not detected in hu-mouse lymph nodes after six weeks of venetoclax treatment.** Hu-mice were treated with venetoclax for 6 weeks while under cover of suppressive ART. At the end of the final treatment week, mice were sacrificed and lymph nodes (LN) pooled for flow cytometric analysis. **(A)** Total number of each cell type. **(B)** Percentage of each cell type. CM = central memory; EM = effector memory.  $p$  values in **(A)** and **(B)** were calculated using a Mann-Whitney two-tailed  $t$  test. Error bars show mean  $\pm$  S.D. Related to Figure 1.

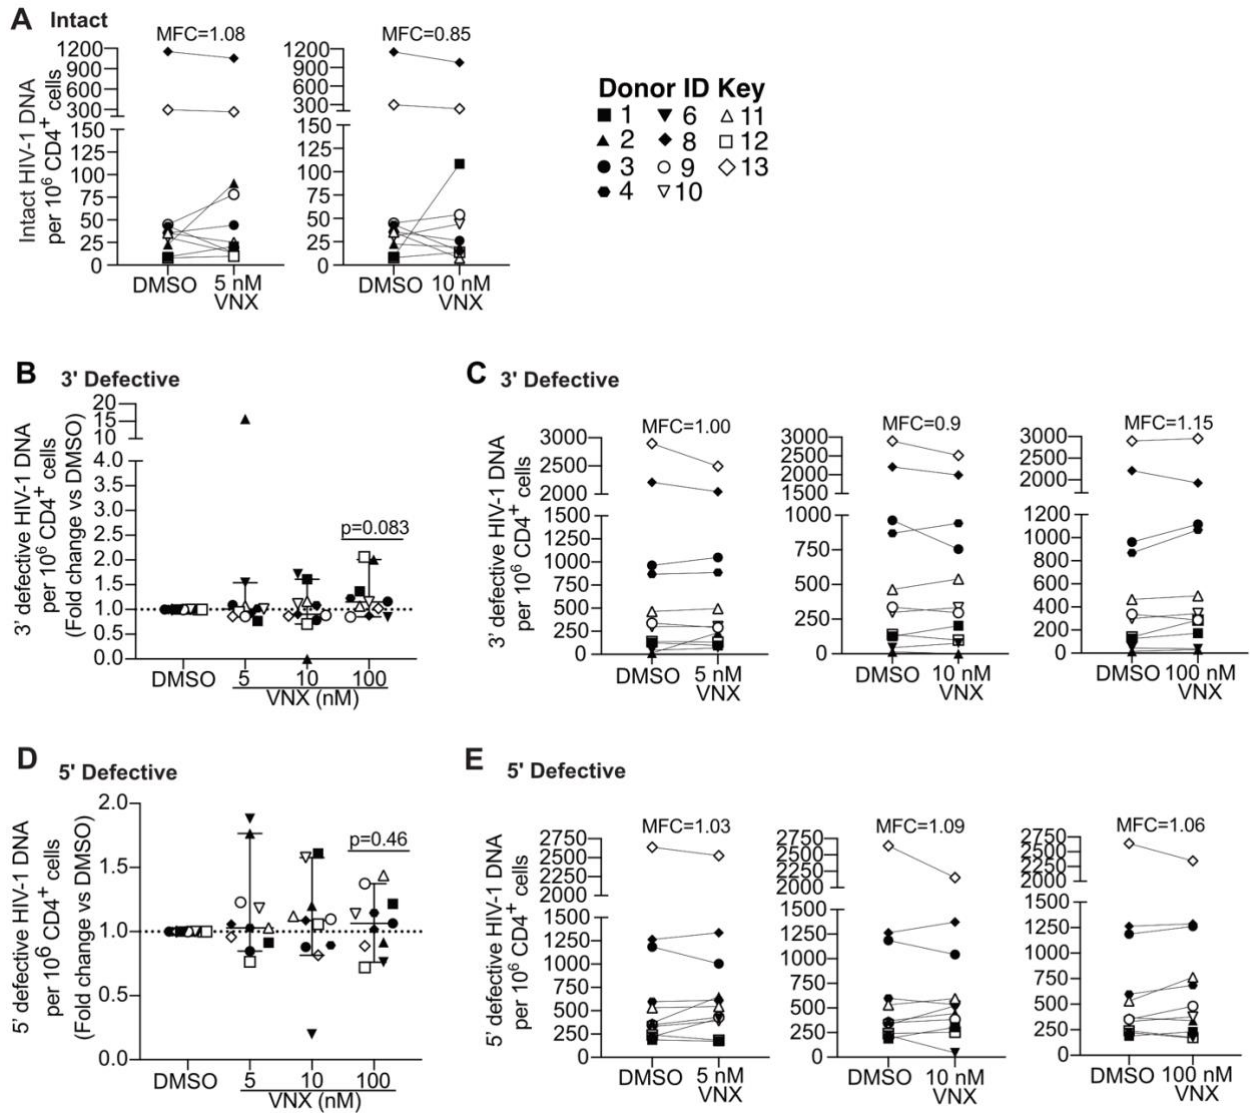

**Supplementary Fig. S4 | Frequency of proviral HIV-1 DNA based on IPDA analysis of peripheral blood CD4<sup>+</sup> T cells treated with DMSO or venetoclax.** Total CD4<sup>+</sup> T cells isolated from peripheral blood of PLWH on ART were co-cultured with venetoclax (VNX) or DMSO control for 24 hrs, before washing and harvesting 24 hrs later for quantification of HIV-1 DNA. **(A)** Absolute frequency of intact HIV-1 DNA per million CD4<sup>+</sup> T cells for 5 nM and 10 nM doses. **(B)** Fold-change in 3' defective HIV-1 DNA per million CD4<sup>+</sup> T cells. **(C)** Absolute frequency of 3' defective HIV-1 DNA per million CD4<sup>+</sup> T cells for 5 nM, 10 nM and 100 nM doses. **(D)** Fold-change in 5' defective HIV-1 DNA per million CD4<sup>+</sup> T cells. **(E)** Absolute frequency of 5' defective HIV-1 DNA per million CD4<sup>+</sup> T cells for 5 nM, 10 nM and 100 nM doses. n = 11 donors. Each symbol represents a different donor. MFC = median fold-change. Error bars show median ± 95% CI. Related to Figure 4.

**Supplementary Table 1** | Clinical information for HIV-1-infected individuals on ART. Related to Figure 4 and S4.

| Donor ID | Age | Gender | Ethnicity               | Years on ART | Current ART Regimen                                                   | Viral Load (copies/mL) | Nadir CD4 (cells/mm <sup>3</sup> ) | Current CD4 (cells/mm <sup>3</sup> ) |
|----------|-----|--------|-------------------------|--------------|-----------------------------------------------------------------------|------------------------|------------------------------------|--------------------------------------|
| 1        | 49  | Male   | Caucasian               | 20.3         | Tenofovir disoproxil fumarate/emtricitabine/darunavir/ritonavir       | <20                    | 218                                | 833                                  |
| 2        | 48  | Male   | Caucasian               | 6.8          | elvitegravir/tenofovir alafenamide fumarate/emtricitabine/cobicistat  | <20                    | 538                                | 864                                  |
| 3        | 56  | Male   | Caucasian               | 21.0         | raltegravir, darunavir, ritonavir                                     | <20                    | 624                                | 744                                  |
| 4        | 53  | Male   | Caucasian               | 14.2         | abacavir/lamivudine/efavirenz                                         | <20                    | 300                                | 735                                  |
| 5        | 68  | Male   | White/European American | 23           | abacavir/dolutegravir/lamivudine                                      | <40                    | 30                                 | 494                                  |
| 6        | 70  | Male   | Caucasian               | 32.7         | abacavir/dolutegravir/lamivudine                                      | <40                    | 13                                 | 524                                  |
| 7        | 61  | Male   | Hispanic/Latino         | 25.3         | abacavir/dolutegravir/lamivudine                                      | <40                    | 4                                  | 837                                  |
| 8        | 49  | Male   | Caucasian               | > 3 years*   | elvitegravir/cobicistat/emtricitabine/ tenofovir alafenamide fumarate | <20                    | 42                                 | 474                                  |
| 9        | 67  | Male   | Caucasian               | 10.9         | abacavir, dolutegravir, lamivudine                                    | <20                    | 315                                | 534                                  |
| 10       | 69  | Male   | Caucasian               | 33.3         | lamivudine, duranavir, ritonavir, dolutegravir                        | <40                    | 98                                 | 800                                  |
| 11       | 66  | Male   | Caucasian               | 34.2         | Emtricitabine, tenofovir disoproxil fumarate, darunavir, cobicistat   | <40                    | 54                                 | 466                                  |
| 12       | 46  | Male   | Hispanic/Latino         | 11.9         | rilpivirine, tenofovir disoproxil fumarate, emtricitabine             | <40                    | 324                                | 429                                  |
| 13       | 56  | Male   | Caucasian               | 31           | darunavir, ritonavir, abacavir, dolutegravir, lamivudine              | <40                    | 200                                | 586                                  |

\*Time on ART unknown. At study enrolment, ART information collected for previous 3 years only.
